# Supplementary material for: Improved ionic diffusion and interfacial charge/mass transfer of ZIF-67-derived Ni–Co-LDH electrodes with bare ZIF-residual for enhanced supercapacitor performance
Source: Royal Society of Chemistry journal article supplement (doi:10.1039/d1nj02201f), 2021-01-01
Supplement: d1nj02201f1.pdf [file d1nj02201f1.pdf]

**Improved ionic diffusion and interfacial charge/mass transfer of  
ZIF-67 derived Ni-Co-LDH electrodes with bare ZIF-residual  
for enhanced supercapacitor performances**

Xiaosen Shang <sup>a</sup>, Hao Mei <sup>b</sup>, Ziyi Li <sup>c</sup>, Changyin Dong <sup>a</sup>, Zengbao Wang <sup>a</sup>, and Ben Xu\*  
<sup>c, d</sup>

<sup>a</sup> College of Petroleum Engineering, China University of Petroleum (East China),  
Qingdao, Shandong 266580, P. R. China.

<sup>b</sup> College of Science, China University of Petroleum (East China), Qingdao, Shandong,  
266580, PR China.

<sup>c</sup> School of Material Science and Engineering, China University of Petroleum (East  
China), Qingdao, Shandong, 266580, PR China.

<sup>d</sup> Key Laboratory of Eco-chemical Engineering, Ministry of Education Laboratory of  
Inorganic Synthesis and Applied Chemistry, College of Chemistry and Molecular  
Engineering, Qingdao University of Science and Technology, Qingdao, 266402, PR  
China.

\*Corresponding author. E-mail: [benxu@upc.edu.cn](mailto:benxu@upc.edu.cn)

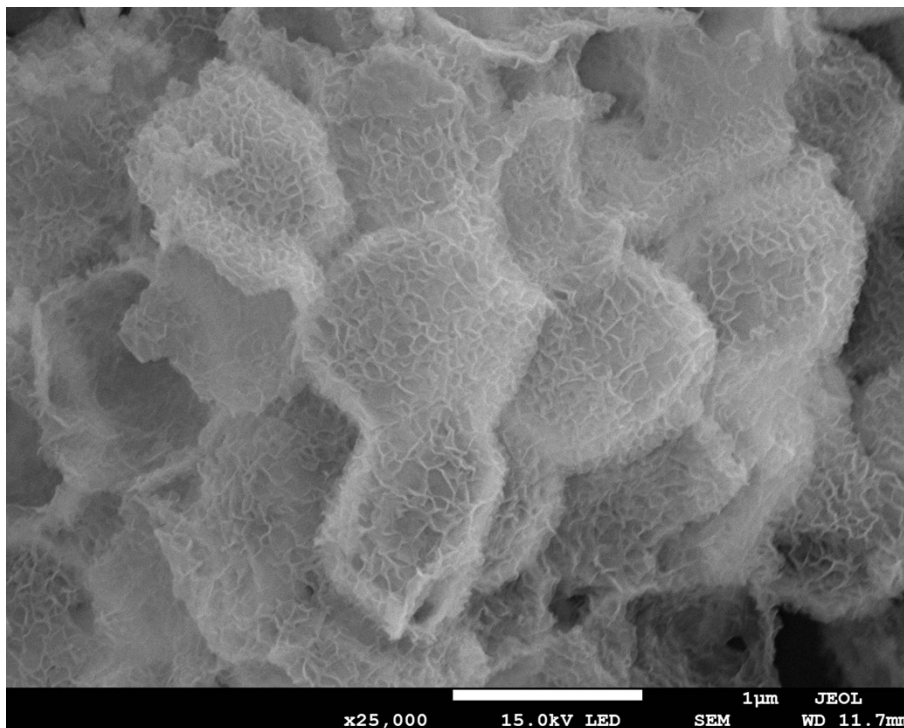

Figure S1 The hierarchical nanocages of Ni-Co-LDH-4.5h

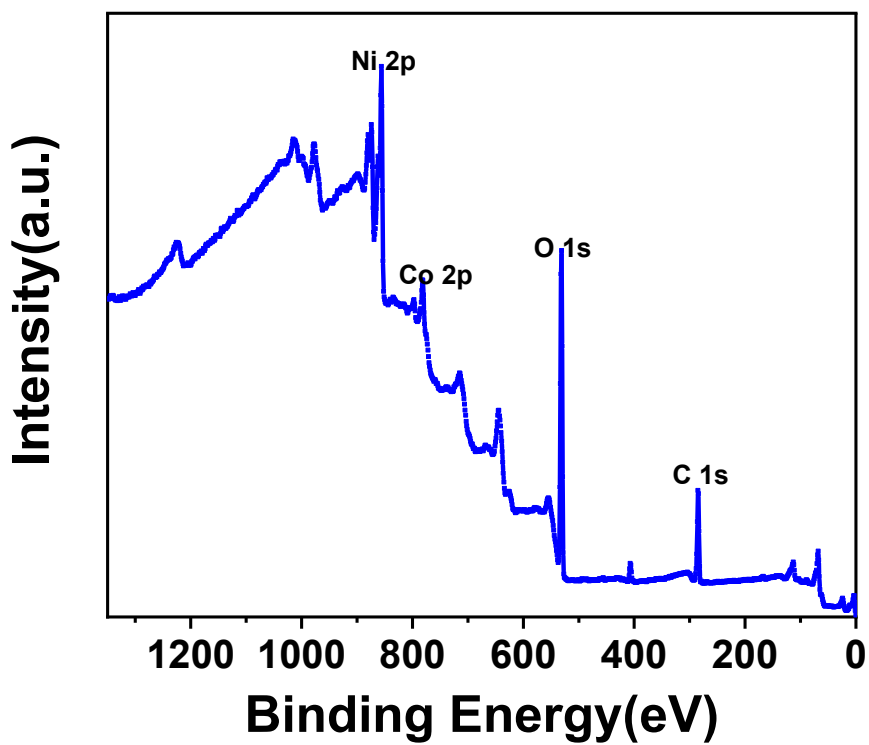

Figure S2 The XPS of Ni-Co-LDH-4.5h

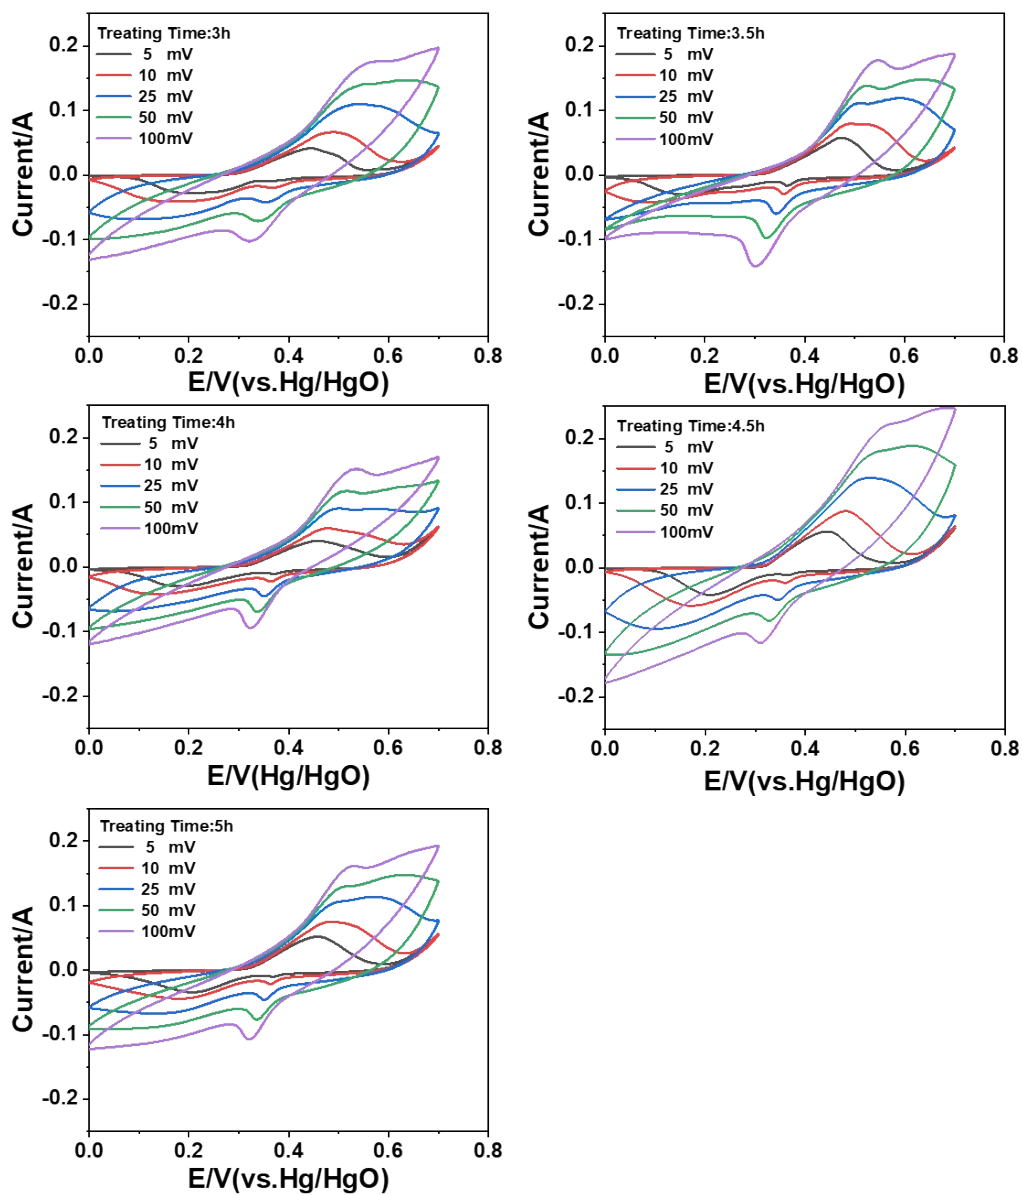

Figure S3 The CVs at different scan rates of Ni-Co-LDH electrodes prepared at different reaction time

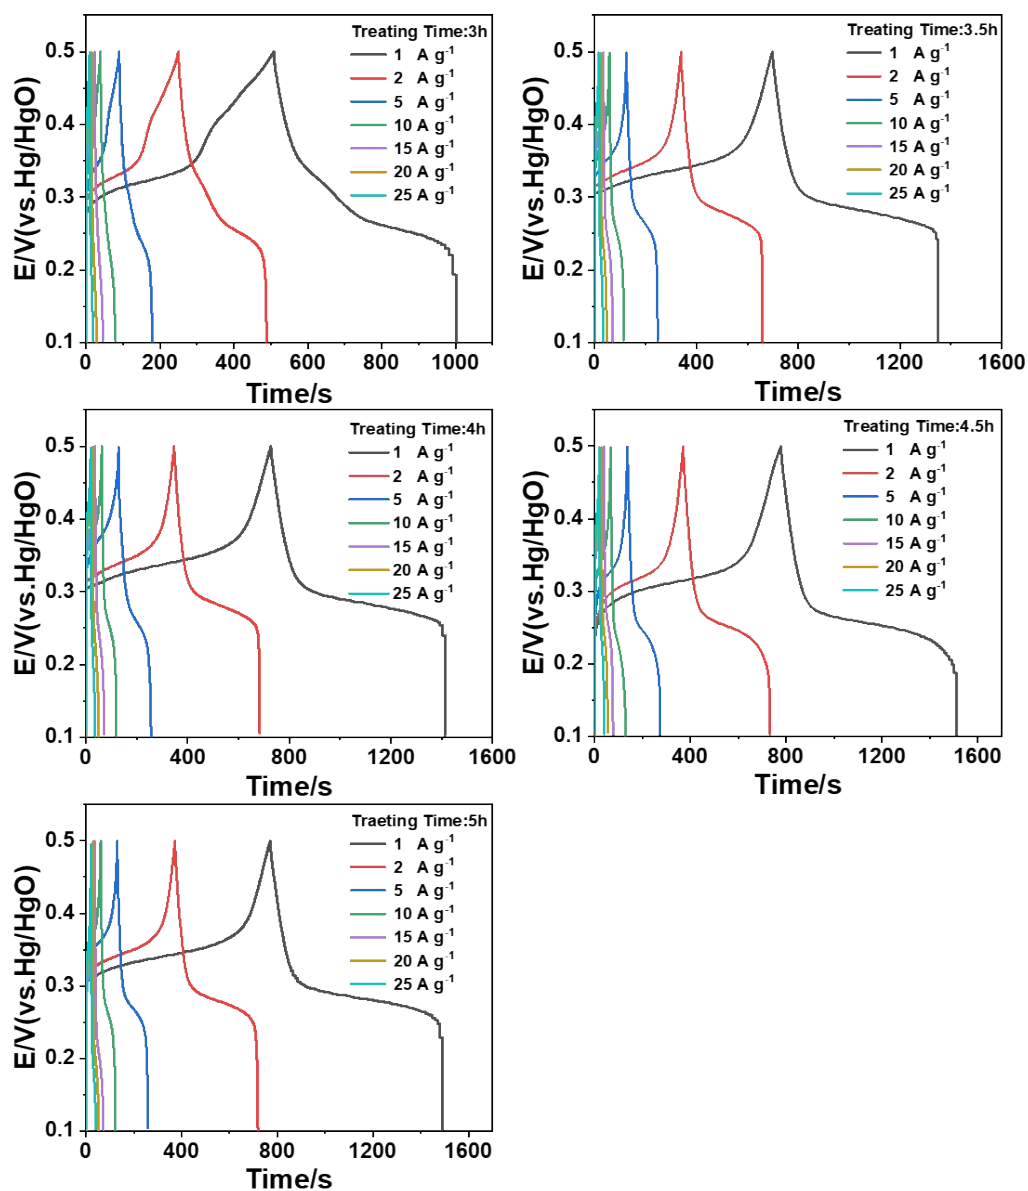

Figure S4 The GCD curves at different scan rates of Ni-Co-LDH electrodes prepared at different time.

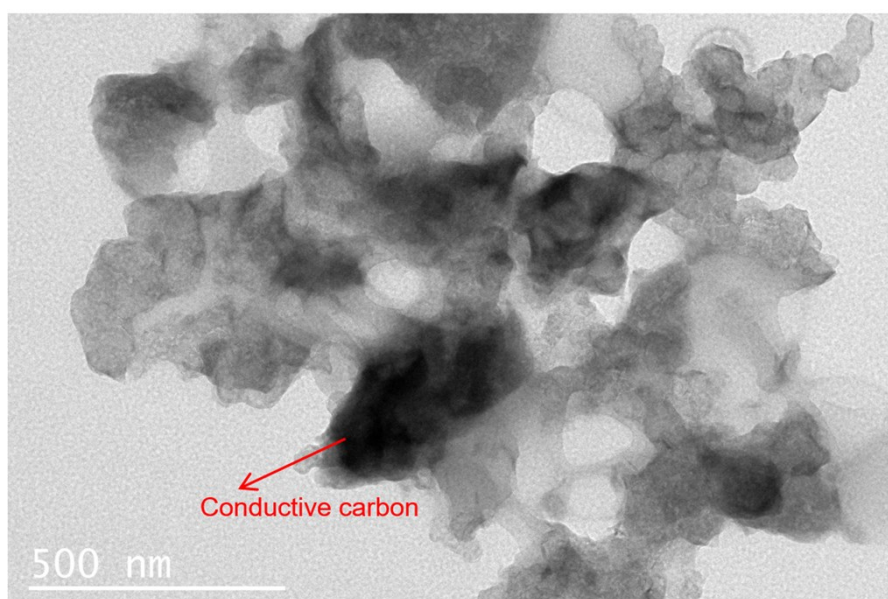

Figure S5. TEM image of Ni-Co-LDH-4.5h electrode after cyclic stability test.

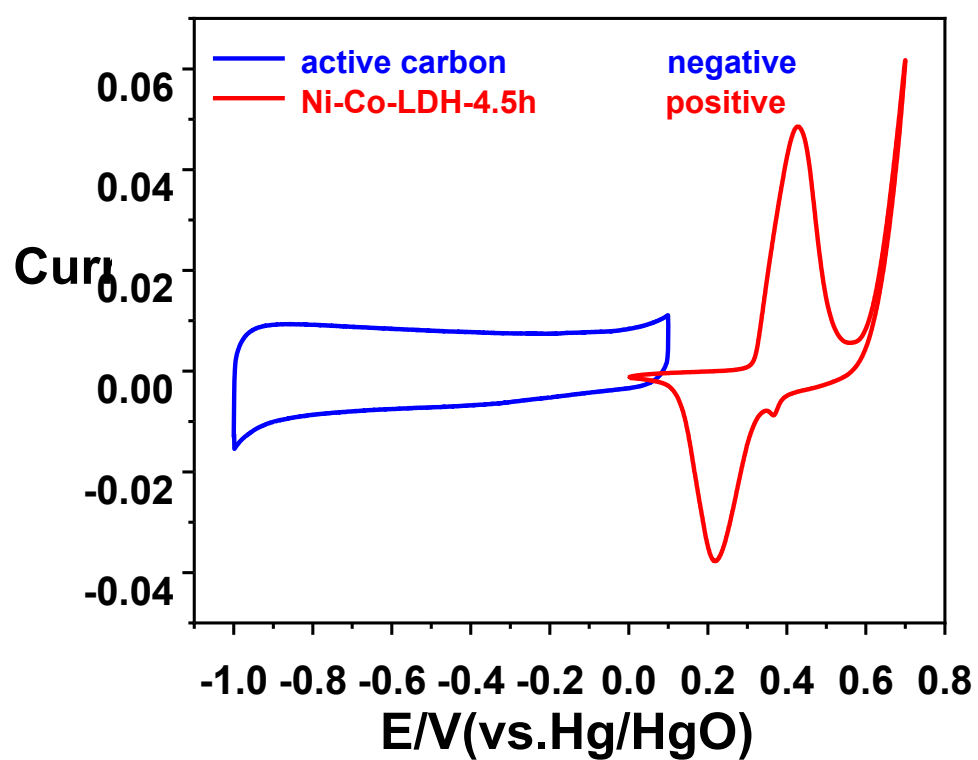

Figure S6 The CVs of the Ni-Co-LDH-4.5h as positive and active carbon as negative.

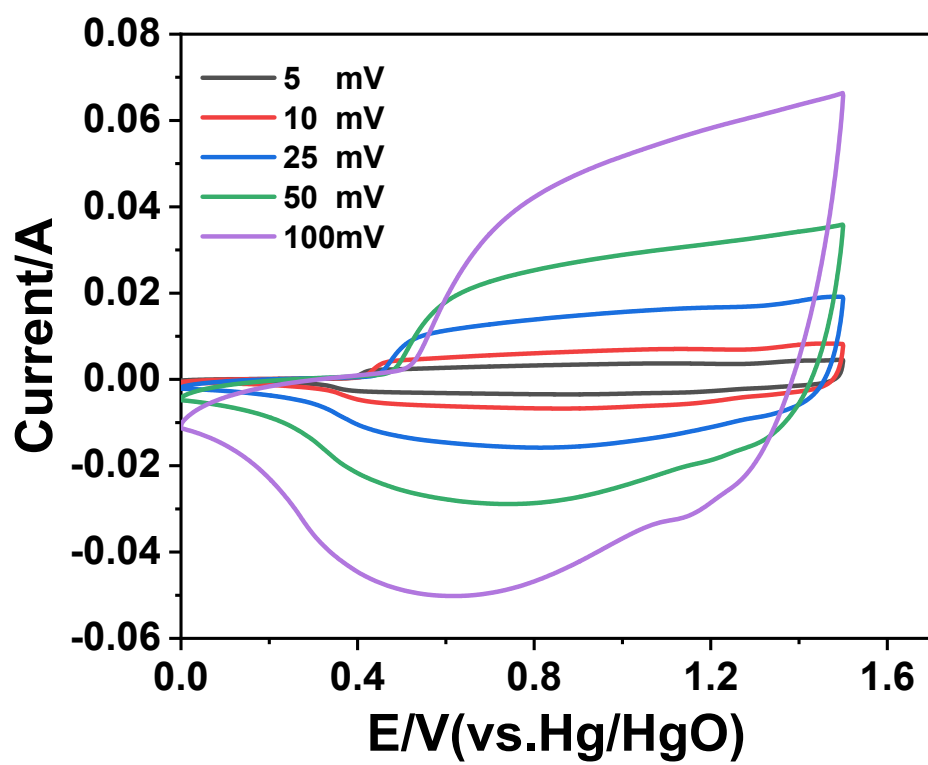

Figure S7 The CVs at different scan rates of the Ni-Co-LDH-4.5h//AC asymmetric devices.
